# Supplementary material
Source: MDPI journal article supplement (https://www.mdpi.com/2304-6740/10/12/236)
Supplement: s1 [file s1]

## Supporting Information

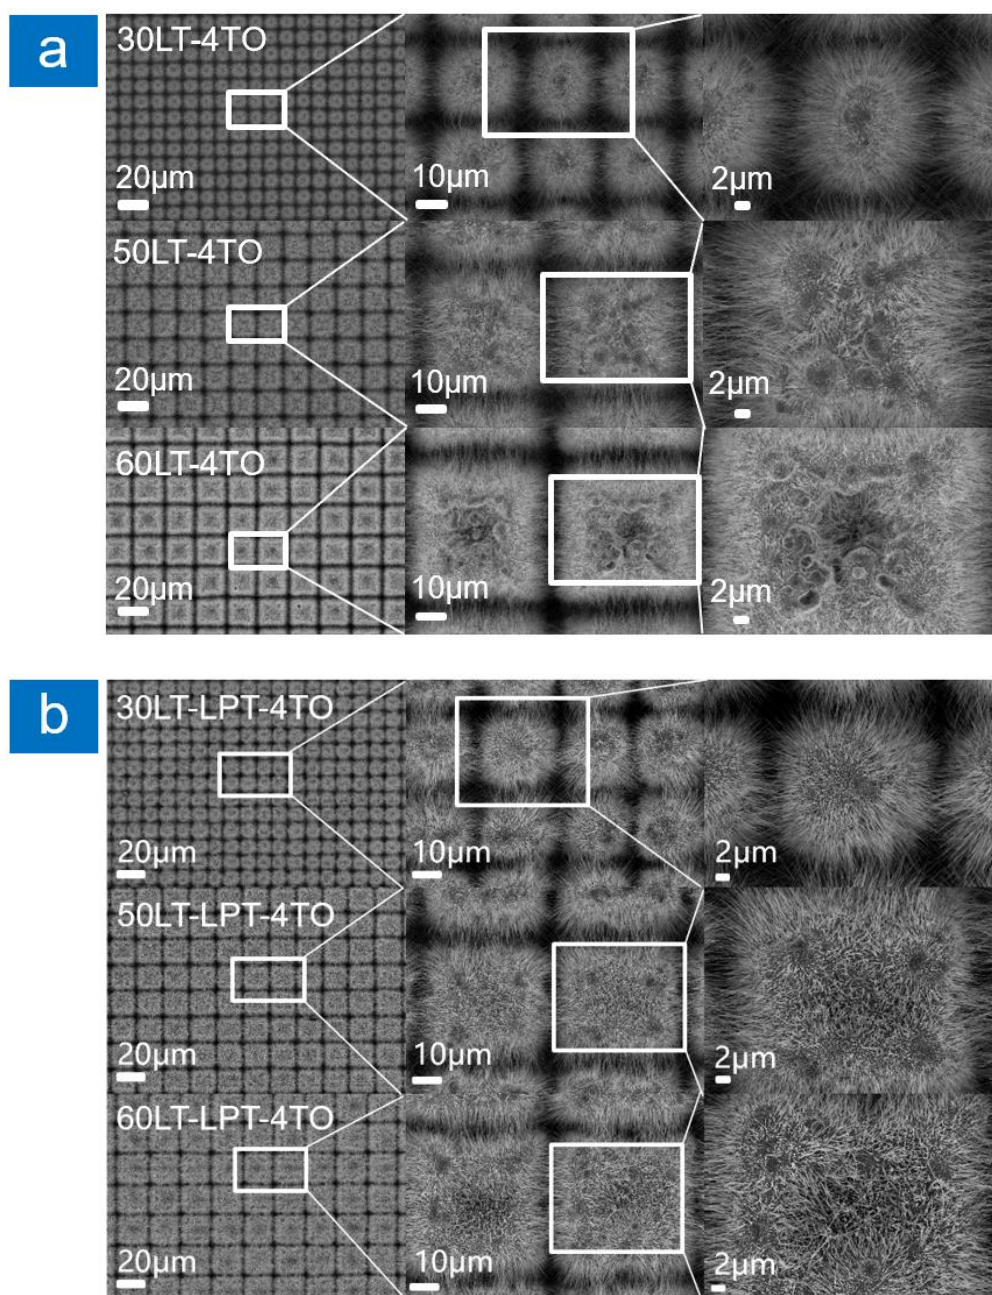

**Figure S1.** SEM images of surface morphologies at different magnifications and laser texturing intervals (thermal oxidation time is 4 hours) (a) without and (b) with the laser post-treatment.

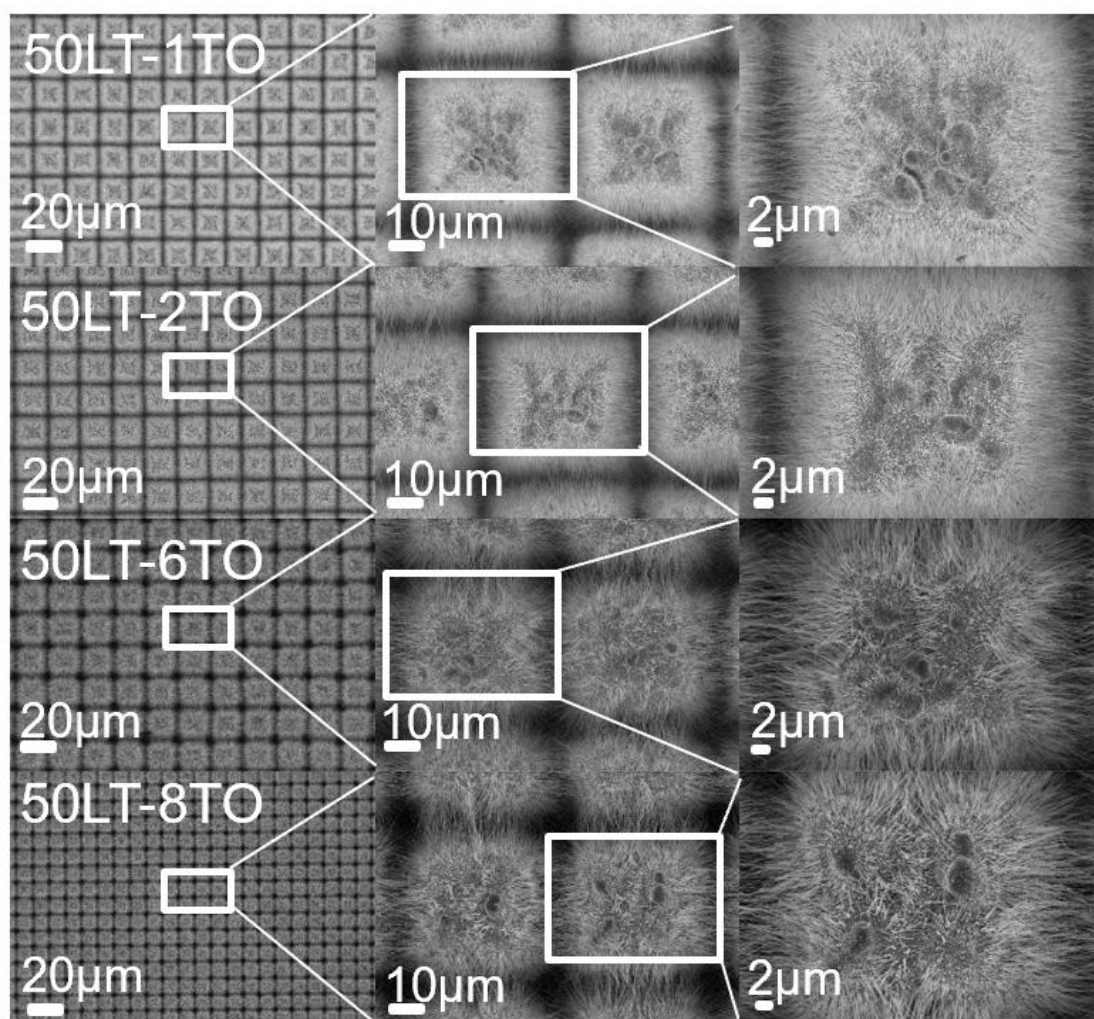

**Figure S2.** SEM images of surface morphologies at different magnifications and thermal oxidation time (laser texturing intervals is 50  $\mu\text{m}$ ).

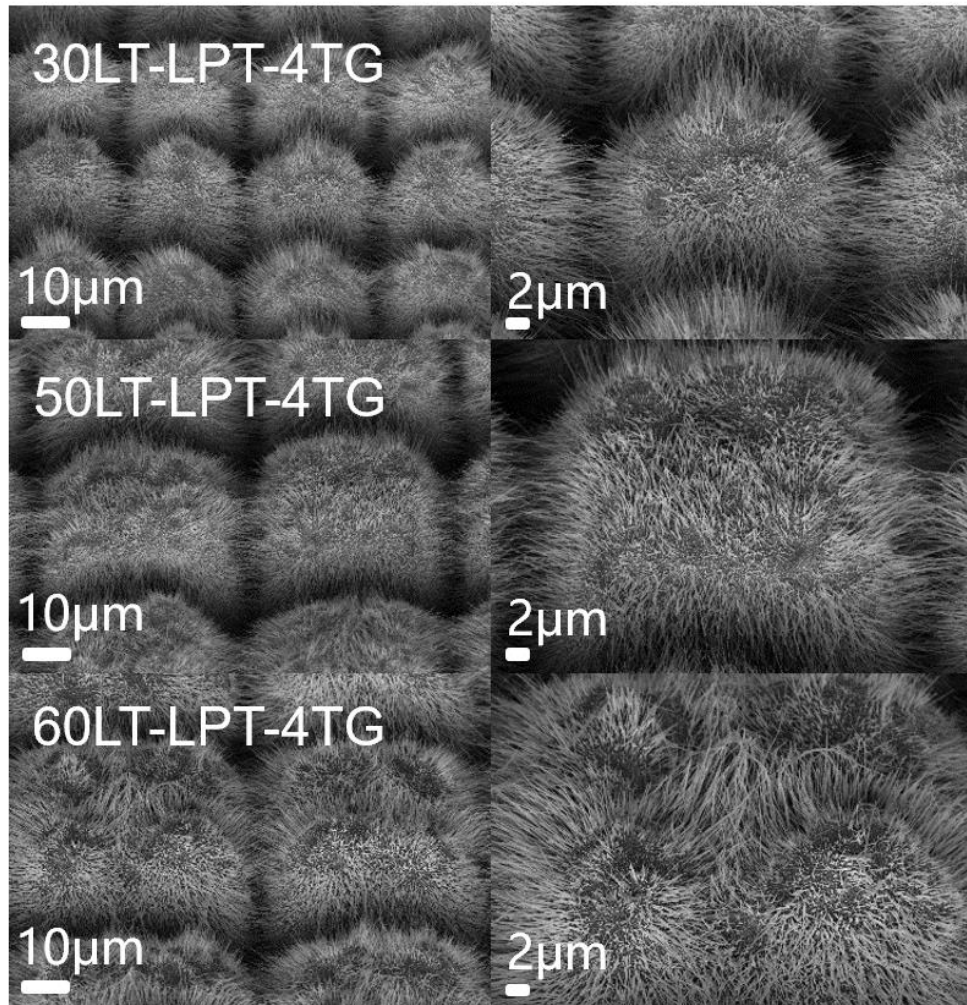

**Figure S3.** SEM images of surface morphologies at an oblique view with the laser post-treatment.

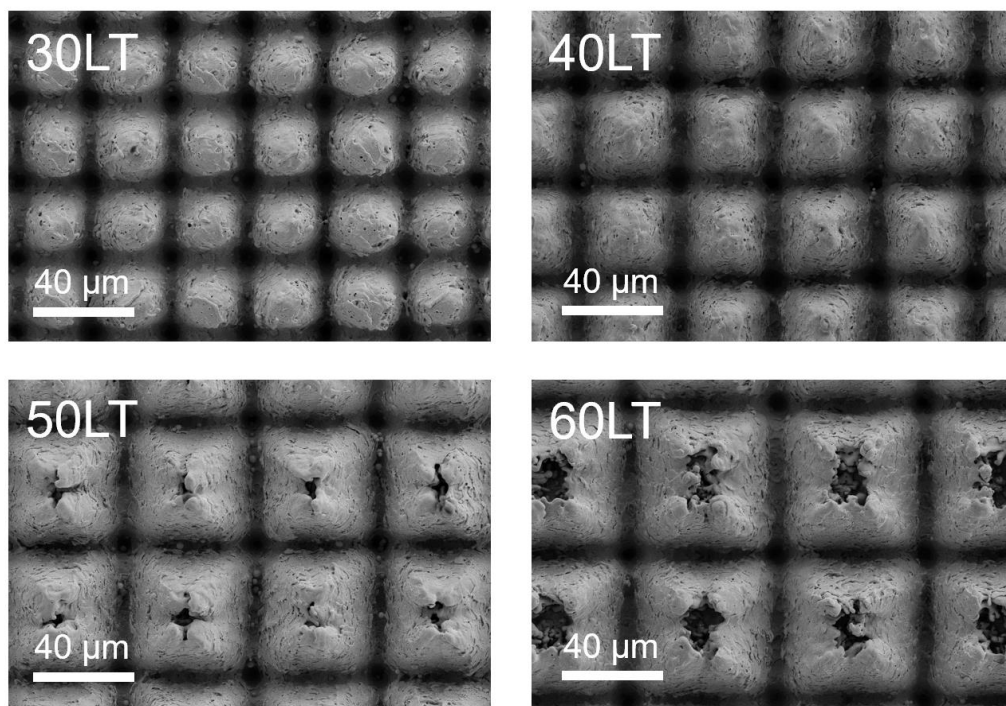

**Figure S4.** SEM images of surface morphologies at different laser texturing intervals without the laser post-treatment.

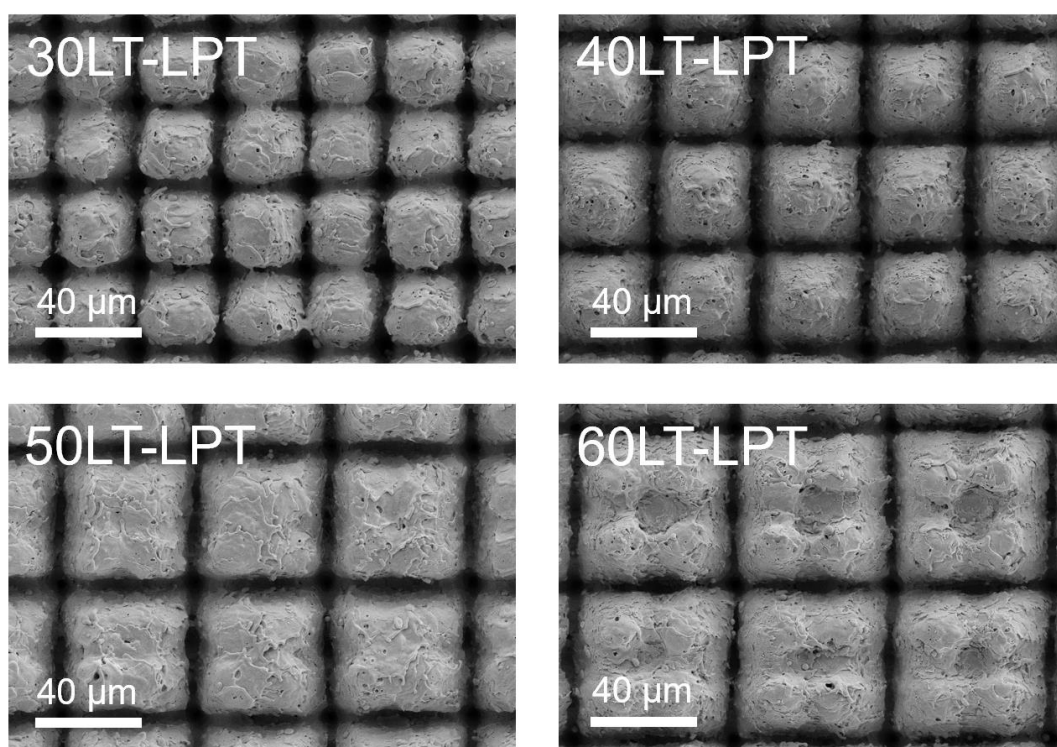

**Figure S5.** SEM images of surface morphologies at different laser texturing intervals with the laser post-treatment.

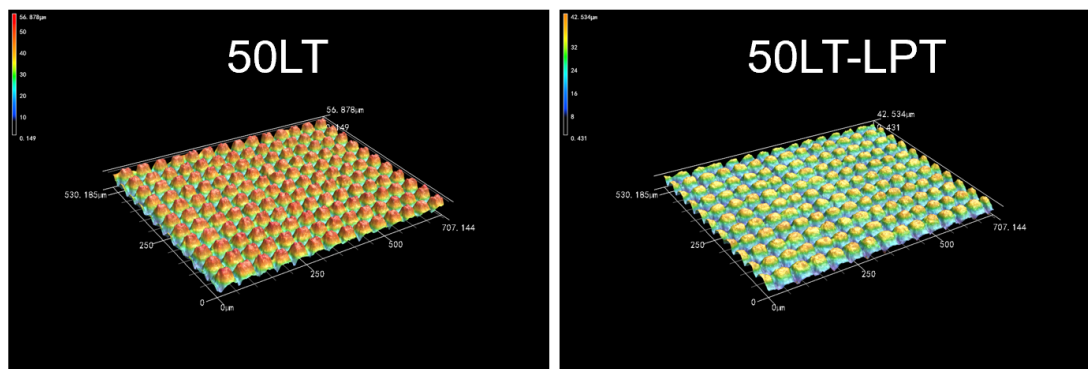

**Figure S6.** Ultra-depth-of-field microscope image of samples with and without laser post-treatment.

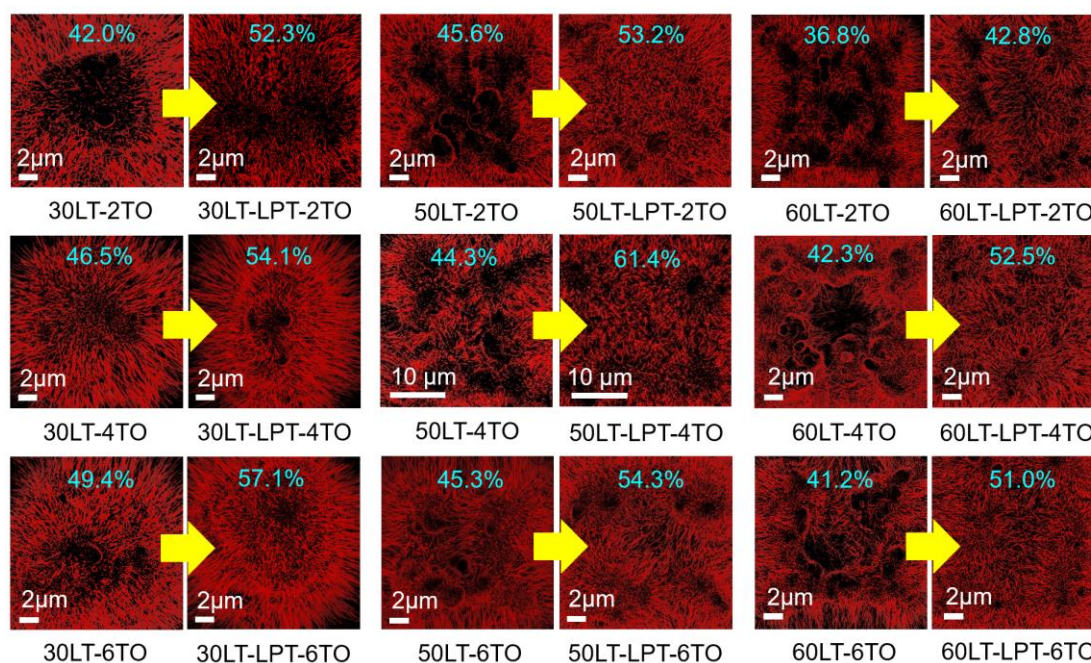

**Figure S7.** Statistical SEM images of density of nanowires on different samples with and without laser post-treatment.
